# Supplementary material for: The cannabinoid Δ9-tetrahydrocannabivarin (THCV) ameliorates insulin sensitivity in two mouse models of obesity
Source: PubMed Central journal article supplement (PMC3671751; doi:10.1038/nutd.2013.9), 2013-05-27

**a**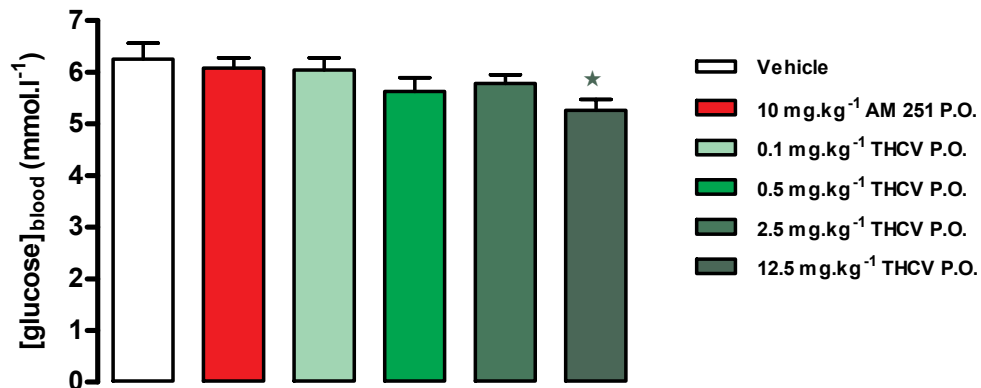**b**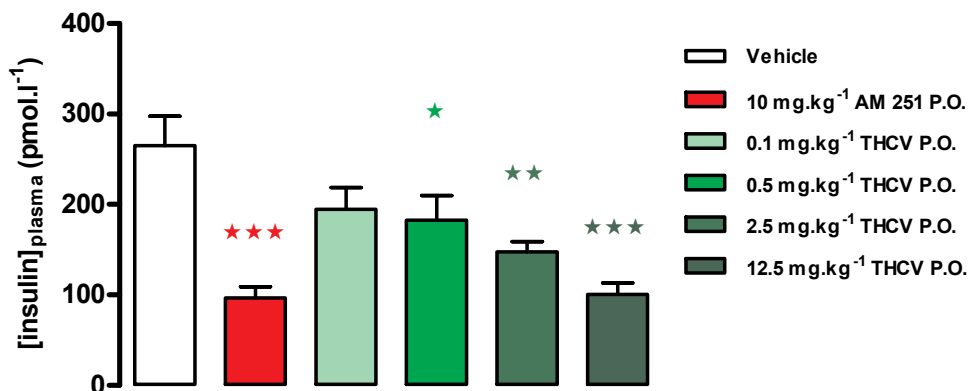**c**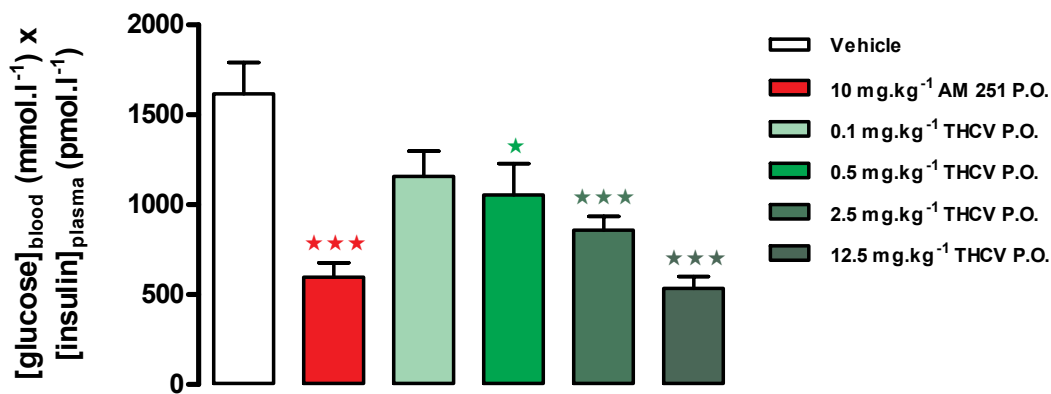

Supplement: nutd20139x2.pdf [file nutd20139x2.pdf]
